# Supplementary material
Source: Elsevier journal article supplement (https://rcastoragev2.blob.core.windows.net/2d84e5dd3edb6bed71c096d62428822a/mmc3.pdf)

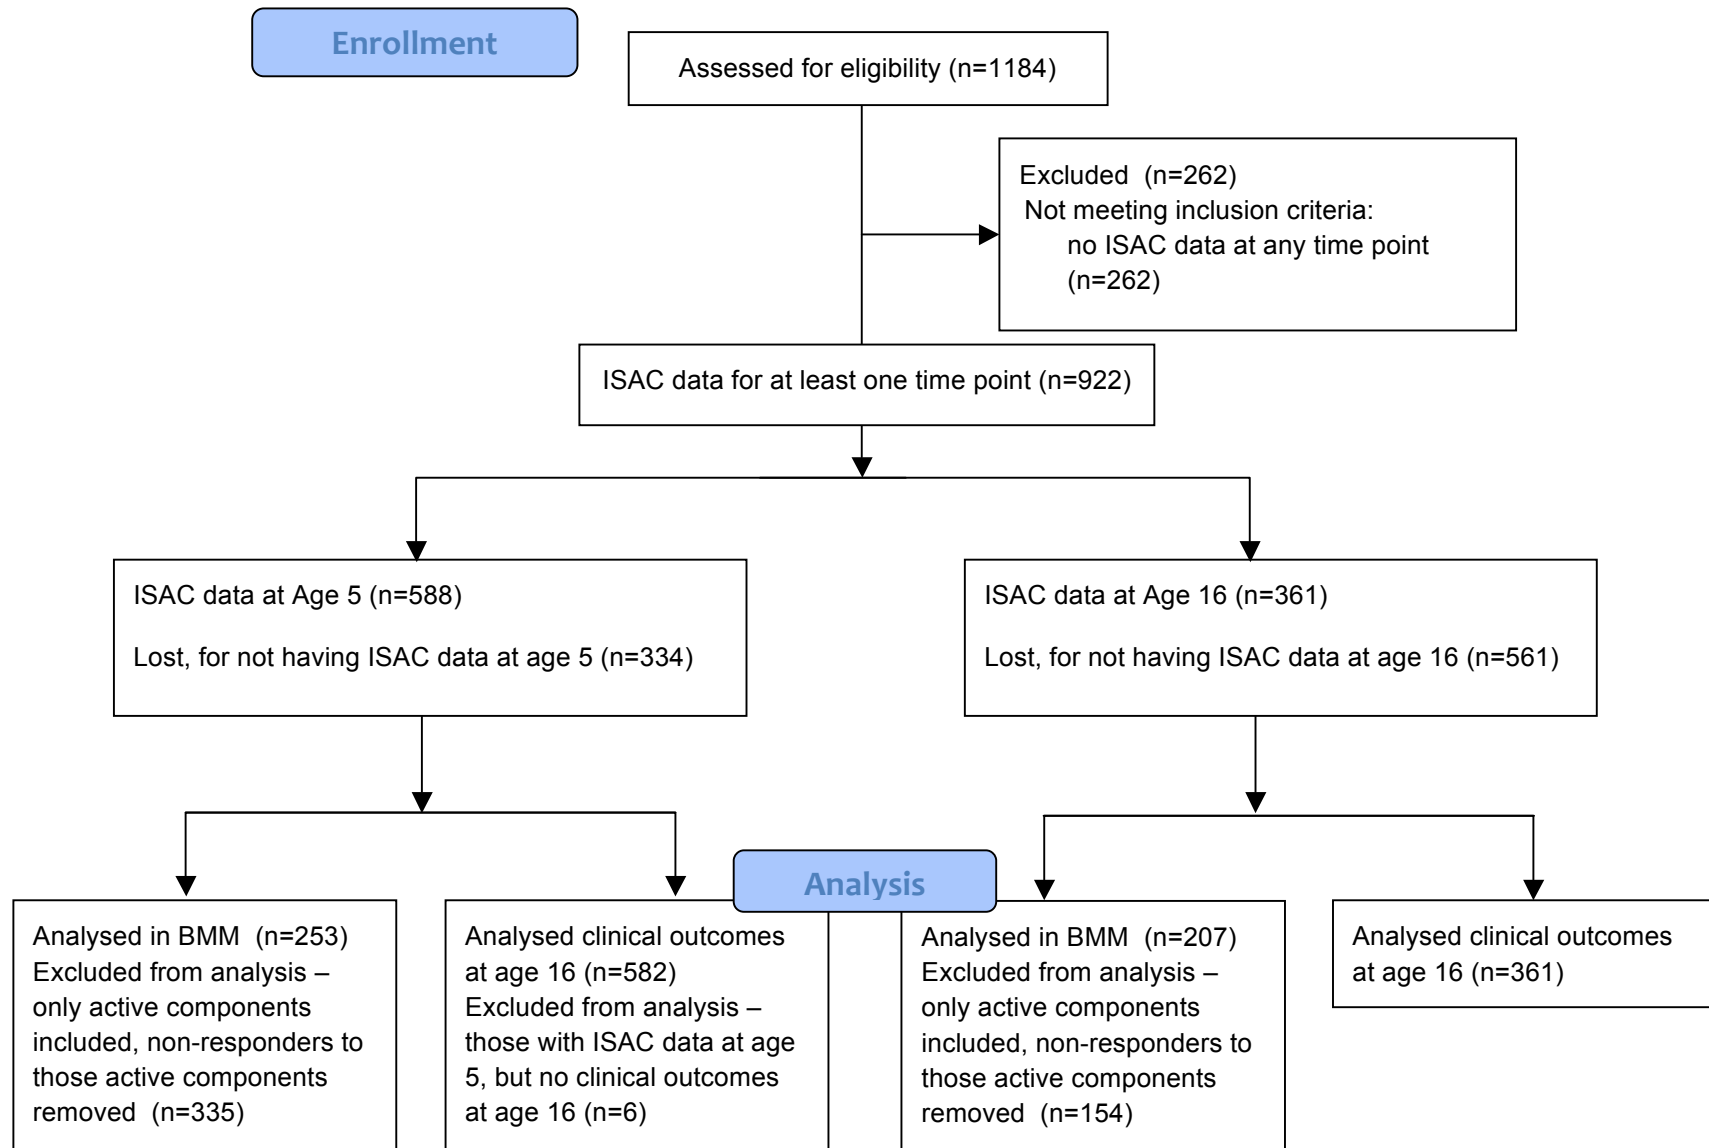

Supplement: mmc3 [file mmc3.pdf]
